# Supplementary material for: Preparation of novel, moisture-stable, Lewis-acidic ionic liquids containing quaternary ammonium salts with functional side chains
Source: Royal Society of Chemistry journal article supplement (doi:10.1039/b106357j), 2001-01-01
Supplement: b106357j.doc [file b106357j.doc]

SUPPLEMENTARY INFORMATION

Plot of conductivity against temperature for the ionic liquid formed from zinc chloride and choline chloride (2:1)
